# Supplementary material
Source: PubMed Central journal article supplement (PMC3558023)
Supplement: mp300316n_si_001.pdf [file mp300316n_si_001.pdf]

## Supporting Information

### Fluorescent labeled IL-10 : SDS-PAGE and western blot analysis

The labeling of IL-10 with the fluorophore Atto655 was performed as recommended by the supplier ([www.atto-tec.com](http://www.atto-tec.com)). The dye was applied in a molar ratio of 2 : 1 corresponding to the molecular weight of the IL-10 monomer (~19 kD).

Sodium dodecyl sulfate polyacrylamide gel electrophoresis (SDS-PAGE) techniques were used for the detection of Atto655 labeled IL-10. All additional reagents were purchased from Bio-Rad Laboratories, München, Germany. Labeled and native IL-10 were diluted with double-distilled water and mixed in a ratio of 1:1 with Laemmli sample buffer. The protein was then applied on a 15% Tris-HCl precast gel. A broad range pre-stained SDS-PAGE standard was used for the size mapping of IL-10. After fluorescence imaging of the labeled protein excited at  $\lambda_{flu}= 750$  nm (Maestro In Vivo Imaging System™, CRi, Woburn, MA), the gel was control stained with Bio-Safe™Coomassie G250 stain.

Western blotting was used for the examination of possible steric changes in IL-10 due to the fluorescence-labeling process. Samples from unstained precast gels were blotted to polyvinylidenedifluoride membranes. Immunoblots were incubated with the primary monoclonal rabbit anti-human IL-10 antibody (Epitomics, U.S.A.), detected using a horseradish peroxidase-conjugated goat anti-rabbit secondary antibody (Thermo Scientific, Germany) and visualized by the chemoluminescence reaction with the SuperSignal® West Femto maximum sensitivity substrate (all from Pierce Protein Research Products, Rockford, IL).

The results are summarized in Figure S1. Although the protein-dye complex tended to precipitate during dialysis, the labeling process was overall successful. During the reaction a minor amount of the IL-10 monomer formed dimers (the *native* state of IL-10) and higher molecular weight fragments in traces, which also bound the fluorescence marker.  $\beta$ -mercaptoethanol and heat denaturation reduced the higher fragments and the dimer into the monomeric form.

### Calculation of the number of lipid and IL-10 molecules per liposome

By knowing the average diameter size of extruded unilamellar IL-10-liposomes and by applying the general equation of the surface area of a sphere (1), we calculated the number of

lipid molecules per liposome (2), and consecutively the number of IL-10 molecules attached to each liposome, as follows:

$$A = 4\pi \left(\frac{d}{2}\right)^2 \quad (1)$$

where  $A$  corresponds to the surface area of the liposome and  $d$  to the diameter

$$N_{tot} = \frac{4\pi \left(\frac{d}{2}\right)^2 + 4\pi \left(\frac{d}{2} - h\right)^2}{a} \quad (2)$$

where  $N_{tot}$  corresponds to the total number of lipid molecules in one liposome;  $h$  to the thickness of the bilayer of about 5 nm;  $d/2 - h$  to the inner radius of the liposome and  $a$  the head group area of the phospholipid molecules, which is about 0.65 nm<sup>2</sup> per molecule for phosphatidylcholines<sup>1</sup>. According to dynamic light scattering measurements, the average diameter size ( $d$ ) of the extruded, IL-10-coated liposomes is about 184.5 nm  $\pm$  1.6. Knowing both, the phospholipid concentration and the final volume of the solution, and by applying the equation (3), we found that the number of liposomes/ml was equivalent to 1.75E16:

$$N_{lipo} = \frac{M_{lipid} \times N_A}{N_{tot} \times 1000} \quad (3)$$

where  $N_A$  corresponds to the Avogadro number equal to 6.022E23;  $M_{lipid}$  to the molar concentration of lipid and  $N_{tot}$  to the number of lipids in one liposome.

Additionally, as determined by Starcher assay<sup>2</sup>, the final concentration of IL-10 was 50.7  $\mu$ g/mL. Using this value the number of molecules of IL-10 (Mw ~ 19kDa) was calculated. We first estimated the number of IL-10 moles (mole = g/MW) and multiplied them for  $N_A$ . The so obtained IL-10 molecules were then divided by the number of liposomes, resulting in a theoretical final ratio of 92 IL-10 molecules per liposome.

### **Intradermal skin tests**

Evans blue (100  $\mu$ L of 5 mg/ml NaCl 0.9%; Merck, Darmstadt, Germany) was injected into the tail vein of immunized mice on day 70. Subsequently, 30  $\mu$ L of the following substances were administered intradermally into the shaved abdominal skin: IL-10-liposomes or non-

targeted liposomes (both 200 µg lipids/ml PBS); IL-10 (200 µg/ml PBS); codfish extract (50 µg/ml PBS) as irrelevant control allergen, mast cell degranulation compound 48/80 (20 µg/ml PBS; Sigma, Steinheim, Germany) as positive control, and PBS as negative control. After 20 minutes, mice were sacrificed and the color reaction examined on the inside of the abdominal skin.

### **Isolation of splenocytes and evaluation of cytokines in stimulated spleen cells**

Preparation of spleen cell suspensions and stimulation was performed as described previously<sup>3</sup>. For stimulation, medium as negative control, Con A (Sigma, Steinheim, Germany; 5 µg/ml) as positive control, non-targeted liposomes (40 µg/ml lipids) or IL-10-liposomes (40 µg/ml) were added for 72 hours.

Mouse IL-1 $\alpha$ , IL-2, IL-4, IL-5, IL-6, IL-10, IL-17, IFN- $\gamma$ , TNF- $\alpha$  and GM-CSF were measured in pooled supernatants of stimulated splenocytes by a multiplex immunoassay and analyzed on a flow cytometer (eBioscience, Vienna, Austria), according to manufacturer's instructions. Additionally, measurement of IL-13 was performed by ELISA with anti-mouse cytokine antibodies and standards (Bender MedSystems, Vienna, Austria), according to manufacturer's instructions.

## Supplement Figures

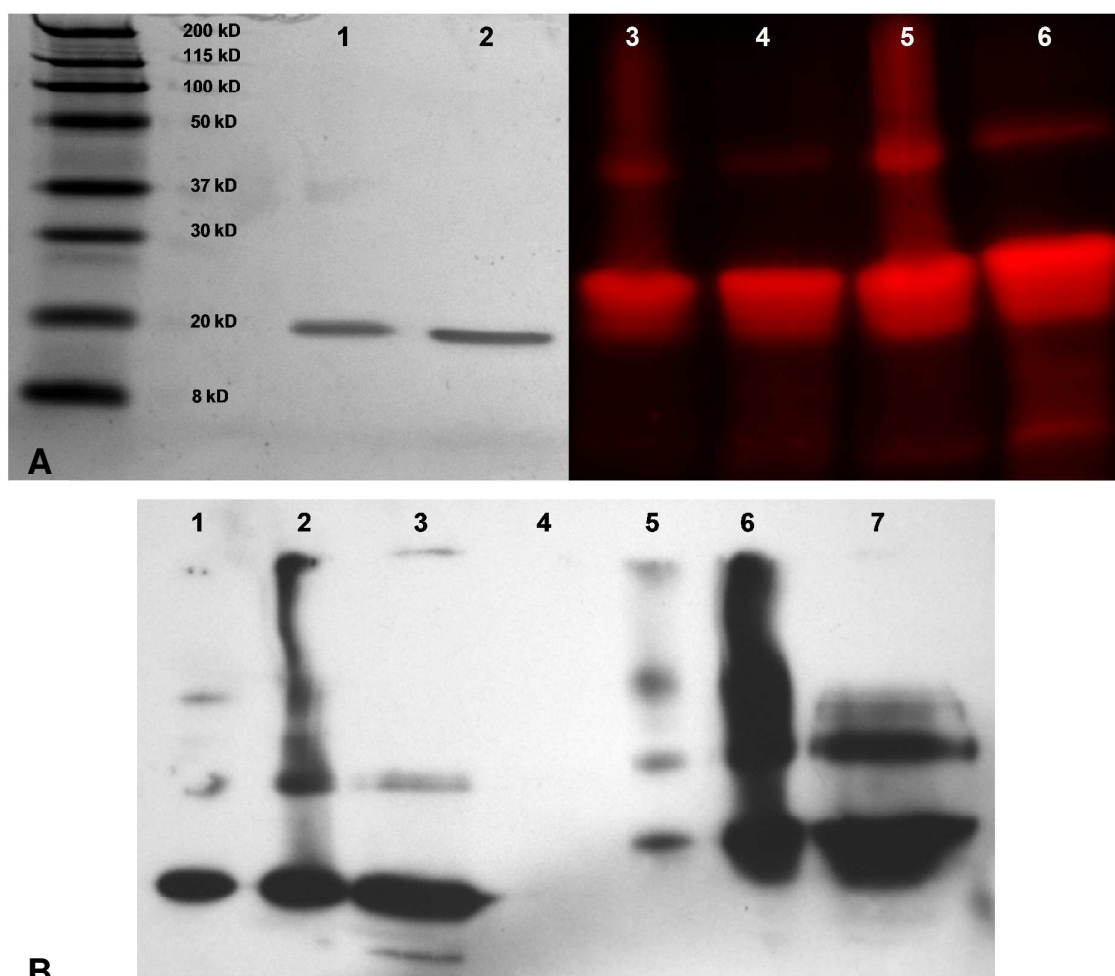

**Figure S1. SDS-PAGE and Western Blot.** Recombinant mouse IL-10 was Atto655 fluorescence labeled, applied on a SDS-PAGE and transferred to a WB Membran. **A** SDS-Page visualized by fluorescence imaging excited at  $\lambda_{flu} = 750$  nm (right panel) and stained with Coomassie blue for the visualization of the *native* IL-10 (left panel). Lane **1**, 2  $\mu$ g *native* IL-10; lane **2**, 2  $\mu$ g *native* IL-10 +  $\beta$ -mercaptoethanol at 96°C for 10 min; lane **3**, 2  $\mu$ g IL-10-Atto655; lane **4**, 2  $\mu$ g IL-10-Atto655 +  $\beta$ -mercaptoethanol at 96°C for 10 min; lane **5**, 4  $\mu$ g IL-10-Atto655; lane **6**, 4  $\mu$ g IL-10-Atto655 +  $\beta$ -mercaptoethanol at 96°C for 10 min. **B** WB of the membrane after the incubation with a primary anti-IL-10 Ab, a secondary HRP-conjugated Ab and the substrate reaction visualized by luminescence. Lane **1**, *native* IL-10 supernatant; lane **2**, *native* IL-10 resolved precipitate; lane **3**, *native* IL-10 resolved precipitate +  $\beta$ -mercaptoethanol at 96°C for 10 min; lane **4**, -; lane **5**, IL-10-Atto655 supernatant; lane **6**, IL-10-Atto655 resolved precipitate; lane **7**, IL-10-Atto655 resolved precipitate +  $\beta$ -mercaptoethanol at 96°C for 10 min.

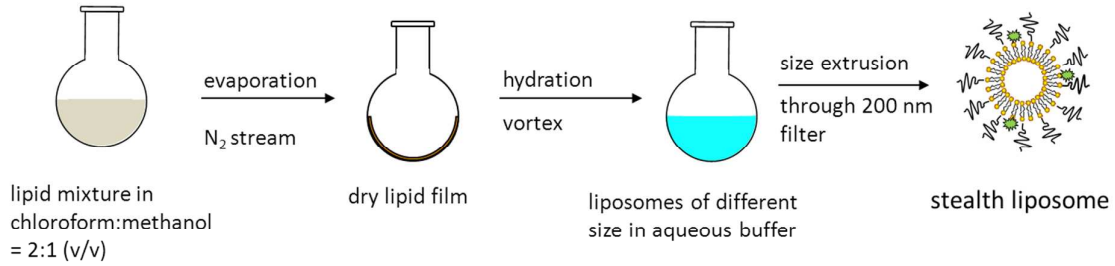

**Lipid mixture :**

POPC : 1-palmitoyl-2-oleoyl-sn-glycero-3-phosphocholine)  
 DSPE-PEG2000 : 1,2-distearoyl-sn -glycero-3-phosphoethanolamine-N-[methoxy (polyethylene glycol)-2000]  
 CH : cholesterol  
 DOPE-CF : 1,2-dioleoyl-sn-glycero-3-phosphoethanolamine-N-(carboxyfluorescein) (ammonium salt)  
 DSPE-PEG2000-NHS: 3-(N-succinimidylxyglutaryl) aminopropyl, polyethylene glycol-200 carbamylidistearoylphosphatidyl-ethanolamine

**Figure S2. Preparation of PEGylated stealth liposomes.**

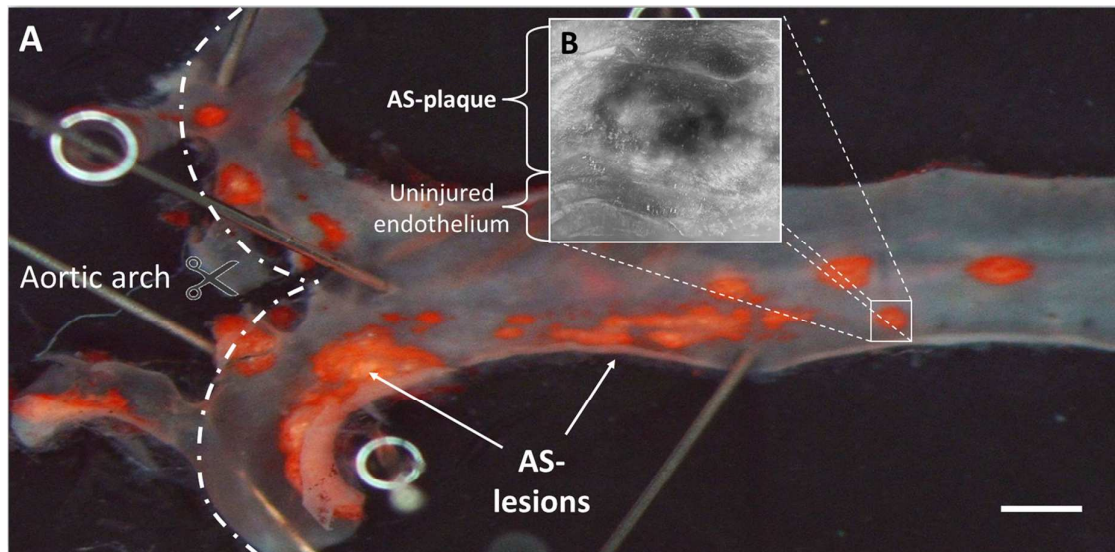

**Figure S3. Orientation of the aortic specimens for CLSM imaging.** **A** Dissected aorta and arch cut open and incubated with oilred-o solution to stain the lipid content of AS-lesions. **B** Optical sections from the inner aortic surface projected into one plane. A series of 25 transmitted light images in Z (1  $\mu$ m consecutive intervals) were projected in a single image showing one single plaque and the surrounding area. Bar corresponds to 1 mm.

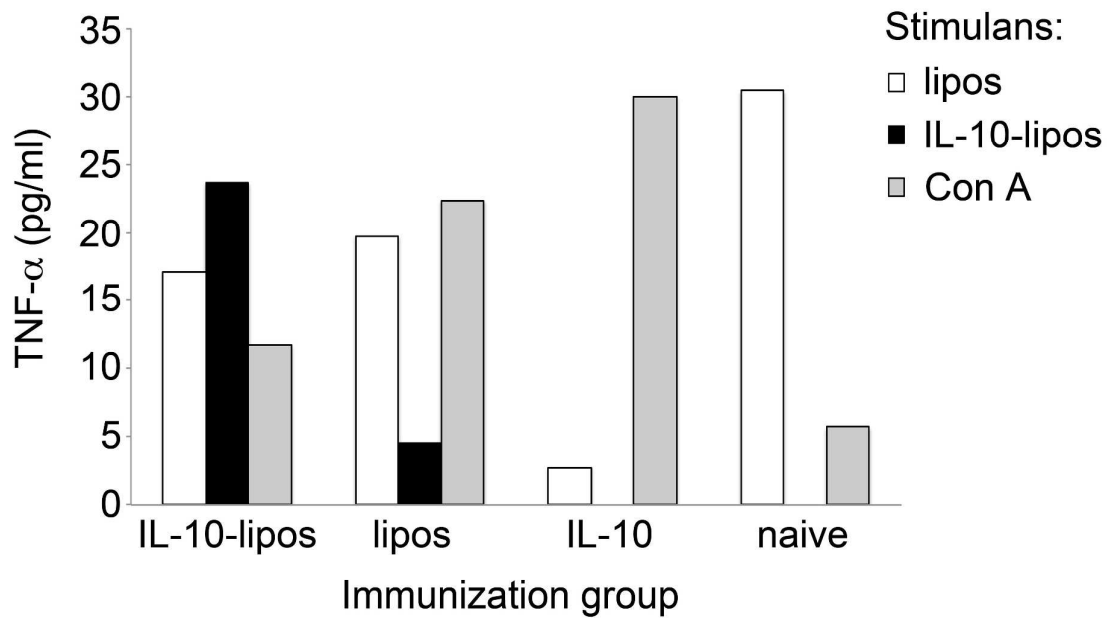

**Figure S4. Cytokine levels in supernatants of stimulated splenocytes.** Spleen cells of Balb/c mice immunized with IL-10-liposomes (IL-10-lipos) i.v., non-targeted liposomes (lipos) i.v, IL-10 i.v. or of naïve animals were incubated with ConA, medium, liposomes or IL-10-liposomes. TNF- $\alpha$  was elevated in splenocyte supernatants of mice immunized with IL-10-liposomes and liposomes i.v. when stimulated with liposomes or IL-10-liposomes, as well as in naïve animals when stimulated with liposomes. Due to usage of pooled supernatants no statistical analysis could be performed. Values of medium stimulation are subtracted.

## Supplement References

1. Lewis, B. A.; Engelman, D. M. Lipid bilayer thickness varies linearly with acyl chain length in fluid phosphatidylcholine vesicles. *J Mol Biol* **1983**, *166*, (2), 211-7.
2. Starcher, B. A ninhydrin-based assay to quantitate the total protein content of tissue samples. *Anal Biochem* **2001**, *292*, (1), 125-9.
3. Pali-Scholl, I.; Herzog, R.; Wallmann, J.; Szalai, K.; Brunner, R.; Lukschal, A.; Karagiannis, P.; Diesner, S. C.; Jensen-Jarolim, E. Antacids and dietary supplements with an influence on the gastric pH increase the risk for food sensitization. *Clinical and experimental allergy : journal of the British Society for Allergy and Clinical Immunology* **2010**, *40*, (7), 1091-8.
